# Supplementary material
Source: HighWire-hosted journal article supplement (https://openheart.bmj.com/content/5/2/e000911)
Supplement: inline-supplementary-material-1 [file inline-supplementary-material-1.docx]

**Thank you for taking the time to complete this survey. By completing this survey, you consent to sharing your perspectives with us. Please note that this survey is completely anonymous and no personal information will be collected.**

1. What is your age?

☐ < 50

☐ 50-64

☐ 65 - 74

☐ 75- 84

☐ > 85

2. Are you:

☐ Male ☐ Female

Treatment options for coronary artery disease in people with weak hearts can range from open heart bypass surgery to stents or medications-only. Each of these treatments can lead to a unique set of outcomes (e.g., prolongation of life, quality of life and disability) depending on the individual’s overall health status. We are conducting this survey to find out what outcomes our patients feel are important, so we can come up with statistical models to help patients and clinicians make patient-centered treatment choices.

3. If a treatment is likely to provide you with better quality of life, would you be willing to sacrifice longevity of life to get this treatment?

☐ Yes ☐ No

4. Please select your most preferred outcome of each the following pairs:

1. ☐ Staying alive for as long as possible vs. ☐ Having a stroke
2. ☐ Staying alive for as long as possible vs. ☐ Being admitted for heart failure

(heart failure causes people to get short of breath easily with minimal activity)

1. ☐ Staying alive for as long as possible vs. ☐ Being admitted for a heart attack
2. ☐ Staying alive for as long as possible vs. ☐ Being hospitalized for any reason
3. ☐ Staying alive for as long as possible vs. ☐ Being admitted to nursing home

5. Please let us know which of the following outcomes you are most interested in. Select all that apply.

☐ Staying alive for as long as possible

☐ Not having a stroke

☐ Not being admitted for heart failure

☐ Not being admitted for a heart attack

☐ Not being admitted to hospital for any reason

☐ Not being admitted to a nursing home

☐ Other, please specify: ______________________________.

6. Which of the following outcomes is most important to you? Please check one:

☐ Staying alive for as long as possible

☐ Not having a stroke

☐ Not being admitted for heart failure

☐ Not being admitted for a heart attack

☐ Not being admitted to hospital for any reason

☐ Not being admitted to a nursing home

7. Which of the following outcomes is second most important to you? Please check one:

☐ Staying alive for as long as possible

☐ Not having a stroke

☐ Not being admitted for heart failure

☐ Not being admitted for a heart attack

☐ Not being admitted to hospital for any reason

☐ Not being admitted to a nursing home

8. Which of the following outcomes is third most important to you? Please check one:

☐ Staying alive for as long as possible

☐ Not having a stroke

☐ Not being admitted for heart failure

☐ Not being admitted for a heart attack

☐ Not being admitted to hospital for any reason

☐ Not being admitted to a nursing home

9. Have you had any of the following conditions before? Please check all that apply:

☐ Stroke

☐ Heart failure

☐ Heart attack

☐ Admission to hospital

☐ Admission to a nursing home

10. If your medical condition warrants admission to hospital, how many hospitalizations per year would you consider to be unbearable?

☐ 1 per year

☐ 2 per year

☐ >= 3 per year

Thank you very much for supporting research at the University of Ottawa Heart Institute!
